# Supplementary material for: Enhancing Comparative Effectiveness Research With Automated Pediatric Pneumonia Detection in a Multi-Institutional Clinical Repository: A PHIS+ Pilot Study
Source: PubMed Central journal article supplement (PMC5447826; doi:10.2196/jmir.6887), 2017-05-15
Supplement: jmir_v19i5e162_app1.pdf [file jmir_v19i5e162_app1.pdf]

Appendix 1: Current Procedural Terminology Codes used to select relevant imaging studies.

| <b>Concept description</b>                                                                                    | <b>CPT Code</b> |
|---------------------------------------------------------------------------------------------------------------|-----------------|
| Computed tomography, thorax; without contrast material                                                        | 71250           |
| Radiologic examination, chest, special views (e.g., lateral decubitus, Bucky studies)                         | 71035           |
| Radiologic examination, chest, complete, minimum of 4 views; with fluoroscopy                                 | 71034           |
| Radiologic examination, chest, complete, minimum of 4 views                                                   | 71030           |
| Radiologic examination, chest, 2 views, frontal and lateral; with fluoroscopy                                 | 71023           |
| Radiologic examination, chest, 2 views, frontal and lateral; with oblique projections                         | 71022           |
| Radiologic examination, chest, 2 views, frontal and lateral; with apical lordotic procedure                   | 71021           |
| Computed tomography, thorax; with contrast material(s)                                                        | 71260           |
| Computed tomography, thorax; without contrast material, followed by contrast material(s) and further sections | 71270           |
| Computed tomography, thorax; without contrast material, followed by contrast material(s) and further sections | 71270           |
| Radiologic examination, chest; single view, frontal                                                           | 71010           |
| Radiologic examination, chest; stereo, frontal                                                                | 71015           |
| Radiologic examination, chest, 2 views, frontal and lateral                                                   | 71020           |
| Ultrasound, chest (includes mediastinum), real time with image documentation                                  | 76604           |
