# Supplementary material for: Enhancing Comparative Effectiveness Research With Automated Pediatric Pneumonia Detection in a Multi-Institutional Clinical Repository: A PHIS+ Pilot Study
Source: PubMed Central journal article supplement (PMC5447826; doi:10.2196/jmir.6887), 2017-05-15
Supplement: jmir_v19i5e162_app3.pdf [file jmir_v19i5e162_app3.pdf]

## Appendix 2: Refined bag-of-words

| BOW1 (99 words)                      |                                      | BOW2 (37 words)                      |                                      | BOW3 (23 words)                      |                                      |
|--------------------------------------|--------------------------------------|--------------------------------------|--------------------------------------|--------------------------------------|--------------------------------------|
| Words associated with positive cases | Words associated with negative cases | Words associated with positive cases | Words associated with negative cases | Words associated with positive cases | Words associated with negative cases |
| adjacent                             | abdominal                            | collection                           | mass                                 | collection                           | mass                                 |
| airspace                             | acute                                | patchy                               | axial                                | patchy                               | free                                 |
| anechoic                             | administration                       | airspace                             | osseous                              | airspace                             | metastatic                           |
| associated                           | anterior                             | hemithorax                           | coronal                              | hemithorax                           | picc                                 |
| atelectatic                          | aortic                               | significant                          | post                                 | significant                          | procedure                            |
| bibasilar                            | arch                                 | bibasilar                            | tissue                               | bibasilar                            | diffuse                              |
| cc                                   | attenuation                          | parenchymal                          | placement                            | parenchymal                          | pericardial                          |
| collection                           | axial                                | consolidated                         | spleen                               | consolidated                         | uneventful                           |
| consolidated                         | axillary                             | opacification                        | free                                 | opacification                        | radiation                            |
| debris                               | bilaterally                          | fever                                | abdominal                            | fever                                |                                      |
| decrease                             | body                                 | hazy                                 | aortic                               | hazy                                 |                                      |
| decreased                            | bones                                | anechoic                             | interstitial                         | anechoic                             |                                      |
| decubitus                            | bony                                 | debris                               | tissues                              | debris                               |                                      |
| evaluate                             | cardiomediastinal                    | level                                | metastatic                           | level                                |                                      |
| fever                                | changes                              |                                      | vascular                             |                                      |                                      |
| hazy                                 | coronal                              |                                      | venous                               |                                      |                                      |
| hemithorax                           | described                            |                                      | picc                                 |                                      |                                      |
| involving                            | diffuse                              |                                      | procedure                            |                                      |                                      |
| largest                              | endotracheal                         |                                      | diffuse                              |                                      |                                      |
| level                                | evaluation                           |                                      | pericardial                          |                                      |                                      |
| limited                              | free                                 |                                      | prominent                            |                                      |                                      |
| lobes                                | glands                               |                                      | uneventful                           |                                      |                                      |
| middle                               | helical                              |                                      | radiation                            |                                      |                                      |
| opacification                        | hemidiaphragm                        |                                      |                                      |                                      |                                      |
| parenchymal                          | interstitial                         |                                      |                                      |                                      |                                      |
| patchy                               | intravenous                          |                                      |                                      |                                      |                                      |
| possible                             | junction                             |                                      |                                      |                                      |                                      |
| recent                               | line                                 |                                      |                                      |                                      |                                      |
| remains                              | mass                                 |                                      |                                      |                                      |                                      |
| represent                            | mediastinum                          |                                      |                                      |                                      |                                      |
| residual                             | metastatic                           |                                      |                                      |                                      |                                      |
| segment                              | osseous                              |                                      |                                      |                                      |                                      |
| significant                          | pancreas                             |                                      |                                      |                                      |                                      |
| simple                               | pericardial                          |                                      |                                      |                                      |                                      |
|                                      | picc                                 |                                      |                                      |                                      |                                      |
|                                      | placement                            |                                      |                                      |                                      |                                      |
|                                      | portions                             |                                      |                                      |                                      |                                      |
|                                      | post                                 |                                      |                                      |                                      |                                      |
|                                      | previously                           |                                      |                                      |                                      |                                      |
|                                      | procedure                            |                                      |                                      |                                      |                                      |
|                                      | prominent                            |                                      |                                      |                                      |                                      |
|                                      | radiation                            |                                      |                                      |                                      |                                      |
|                                      | region                               |                                      |                                      |                                      |                                      |
|                                      | sagittal                             |                                      |                                      |                                      |                                      |
|                                      | scattered                            |                                      |                                      |                                      |                                      |
|                                      | sections                             |                                      |                                      |                                      |                                      |
|                                      | single                               |                                      |                                      |                                      |                                      |

|              |  |  |  |  |
|--------------|--|--|--|--|
| spine        |  |  |  |  |
| spleen       |  |  |  |  |
| status       |  |  |  |  |
| stomach      |  |  |  |  |
| subclavian   |  |  |  |  |
| subsegmental |  |  |  |  |
| superior     |  |  |  |  |
| surgical     |  |  |  |  |
| teaching     |  |  |  |  |
| thorax       |  |  |  |  |
| tissue       |  |  |  |  |
| tissues      |  |  |  |  |
| trainee      |  |  |  |  |
| uneventful   |  |  |  |  |
| vascular     |  |  |  |  |
| vasculature  |  |  |  |  |
| vein         |  |  |  |  |
| venous       |  |  |  |  |
