# Supplementary material for: Enhancing Comparative Effectiveness Research With Automated Pediatric Pneumonia Detection in a Multi-Institutional Clinical Repository: A PHIS+ Pilot Study
Source: PubMed Central journal article supplement (PMC5447826; doi:10.2196/jmir.6887), 2017-05-15
Supplement: jmir_v19i5e162_app4.pdf [file jmir_v19i5e162_app4.pdf]

#### Appendix 4: Document level classification accuracy with different machine learning algorithms

|                                  | Decision Tree | Rule Learner | Naïve Bayes | Bayesian Network | Support Vector Machine |
|----------------------------------|---------------|--------------|-------------|------------------|------------------------|
| <b>True positives</b>            |               |              |             |                  |                        |
|                                  | 29            | 38           | 48          | 51               | 30                     |
| <b>True negatives</b>            |               |              |             |                  |                        |
|                                  | 206           | 196          | 188         | 192              | 206                    |
| <b>False positives</b>           |               |              |             |                  |                        |
|                                  | 7             | 17           | 25          | 21               | 7                      |
| <b>False negatives</b>           |               |              |             |                  |                        |
|                                  | 40            | 31           | 21          | 18               | 39                     |
| <b>Sensitivity</b>               |               |              |             |                  |                        |
|                                  | 0.420         | 0.551        | 0.696       | 0.739            | 0.435                  |
| <b>Positive predictive value</b> |               |              |             |                  |                        |
|                                  | 0.806         | 0.691        | 0.658       | 0.708            | 0.811                  |
| <b>F<sub>1</sub>-measure*</b>    |               |              |             |                  |                        |
|                                  | 0.552         | 0.613        | 0.676       | 0.723            | 0.566                  |
| <b>Specificity</b>               |               |              |             |                  |                        |
|                                  | 0.967         | 0.920        | 0.883       | 0.901            | 0.967                  |
| <b>Accuracy</b>                  |               |              |             |                  |                        |
|                                  | 0.833         | 0.830        | 0.837       | 0.862            | 0.837                  |
